# Supplementary material
Source: PubMed Central journal article supplement (PMC2878000)
Supplement: msn072_1.pdf [file msn072_1.pdf]

**Supplementary Materials for**  
**“Fast Evolution of Core Promoters in Primate Genomes”**

Han Liang, Yeong-Shin Lin and Wen-Hsiung Li\*

This file includes the following figure and tables:

1. Figure S1

The proportion of transitions or AT↔GC substitutions in core promoters

2. Table S1

Inferred positively selected human core promoters

3. Table S2

Rate analysis on inferred positively selected human core promoters

4. Table S3

GO term analysis of inferred positively selected genes

5. Table S4

The SNPs with an extreme *iHS* value

Fig. S1. The proportion of transitions or AT↔GC substitutions in core promoters

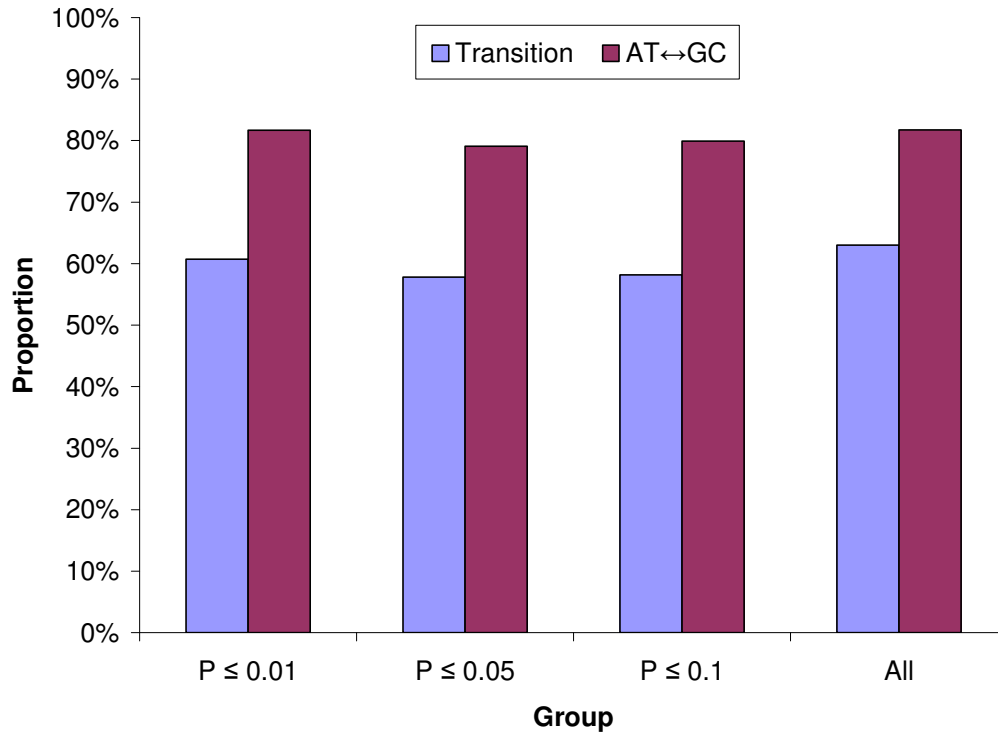

Table S1. Inferred positively selected human core promoters

| Promote location (Hg18)   | Gene_ID | Gene_Symbol | RefSeq       | K <sub>core</sub> | K <sub>pseudo</sub> | K <sub>4</sub> |
|---------------------------|---------|-------------|--------------|-------------------|---------------------|----------------|
| chr1:23367840-23367959    | 7798    | LUZP1       | NM_033631    | 0.1502            | 0.0187              | 0.0702         |
| chr1:151805302-151805421  | 6273    | S100A2      | NM_005978    | 0.1433            | 0.0175              | 0.1067         |
| chr2:120233635-120233754  | 5775    | PTPN4       | NM_002830    | 0.1673            | 0.0085              | 0.0282         |
| chr2:179051624-179051743  | 51661   | FKBP7       | NM_181342    | 0.0895            | 0.0000              | 0.0328         |
| chr3:51397224-51397343    | 7873    | ARMET       | NM_006010    | 0.1774            | 0.0000              | 0.0222         |
| chr6:74287320-74287439    | 1915    | EEF1A1      | NM_001402    | 0.0831            | 0.0000              | 0.0159         |
| chr6:133177451-133177570  | 6206    | RPS12       | NM_001016    | 0.3223            | 0.0421              | 0.0972         |
| chr7:44496899-44497018    | 23386   | NUDCD3      | NM_015332    | 0.1868            | 0.0288              | 0.0458         |
| chr8:11697171-11697290    | 2222    | FDFT1       | NM_004462    | 0.2301            | 0.0309              | 0.0613         |
| chr8:25372694-25372813    | 157313  | CDCA2       | NM_152562    | 0.2002            | 0.0093              | 0.0464         |
| chr9:38383103-38383222    | 219     | ALDH1B1     | NM_000692    | 0.1400            | 0.0175              | 0.0569         |
| chr9:94095703-94095822    | 3376    | IARS        | NM_013417    | 0.1480            | 0.0088              | 0.0468         |
| chr11:120668866-120668985 | 6309    | SC5DL       | NM_001024956 | 0.4687            | 0.0182              | 0.0648         |
| chr11:122437507-122437626 | 3312    | HSPA8       | NM_006597    | 0.2047            | 0.0110              | 0.0595         |
| chr12:52131830-52131949   | 5094    | PCBP2       | NM_005016    | 0.0751            | 0.0000              | 0.0155         |
| chr12:55129071-55129190   | 8914    | TIMELESS    | NM_003920    | 0.1048            | 0.0000              | 0.0313         |
| chr13:46268830-46268949   | 2098    | ESD         | NM_001984    | 0.1148            | 0.0088              | 0.0821         |
| chr16:86357152-86357271   | 54758   | KLHDC4      | NM_017566    | 0.2132            | 0.0278              | 0.0601         |
| chr19:8484945-8485064     | 84330   | ZNF414      | NM_032370    | 0.1209            | 0.0097              | 0.0370         |
| chr20:1047121-1047240     | 9491    | PSMF1       | NM_006814    | 0.1296            | 0.0000              | 0.0000         |
| chr20:17498496-17498615   | 11034   | DSTN        | NM_001011546 | 0.2128            | 0.0093              | 0.0000         |
| chr20:21231755-21231874   | 22803   | XRN2        | NM_012255    | 0.1418            | 0.0177              | 0.0220         |
| chr22:39676601-39676720   | 9978    | RBX1        | NM_014248    | 0.1157            | 0.0096              | 0.0000         |
| chrX:150315926-150316045  | 203547  | LOC203547   | NM_001017980 | 0.0862            | 0.0000              | 0.0278         |

| Gene_Symbol | GO terms                                                                                                      |
|-------------|---------------------------------------------------------------------------------------------------------------|
| LUZP1       | N.A.                                                                                                          |
| S100A2      | Binding                                                                                                       |
| PTPN4       | catalytic activity; protein binding; hydrolase activity; structural molecule activity;                        |
| FKBP7       | catalytic activity; protein binding; isomerase activity                                                       |
| ARMET       | protein binding                                                                                               |
| EEF1A1      | catalytic activity; protein binding; nucleic acid binding; hydrolase activity; translation regulator activity |
| RPS12       | nucleic acid binding; structural molecule activity                                                            |
| NUDCD3      | N.A.                                                                                                          |
| FDFT1       | catalytic activity; oxidoreductase activity; transferase activity                                             |
| CDCA2       | protein binding                                                                                               |
| ALDH1B1     | catalytic activity; oxidoreductase activity;                                                                  |
| IARS        | catalytic activity; ligase activity                                                                           |
| SC5DL       | catalytic activity; oxidoreductase activity                                                                   |
| HSPA8       | catalytic activity; protein binding; hydrolase activity                                                       |
| PCBP2       | protein binding; nucleic acid binding                                                                         |
| TIMELESS    | protein binding;                                                                                              |
| ESD         | catalytic activity; hydrolase activity                                                                        |
| KLHDC4      | N.A.                                                                                                          |
| ZNF414      | nucleic acid binding                                                                                          |
| PSMF1       | protein binding; enzyme regulator activity                                                                    |
| DSTN        | protein binding;                                                                                              |
| XRN2        | catalytic activity; protein binding; nucleic acid binding; hydrolase activity                                 |
| RBX1        | protein binding;                                                                                              |
| LOC203547   | N.A.                                                                                                          |

Table S2. Rate analysis on inferred positively selected human core promoters

| Promoter Location         | $K_{\text{pseudo}}^*$ | $K_{\text{between}}$ | $K_{\text{core}}$ | $K_{\text{intron}}$ | site_4f | n1 | n2 |
|---------------------------|-----------------------|----------------------|-------------------|---------------------|---------|----|----|
| chr1:23367840-23367959    | 0.039                 | 0.0444               | 0.1502            | 0.0529              | 146     | 6  | 4  |
| chr1:151805302-151805421  | 0.0308                | 0.0458               | 0.1433            | 0.0588              | 34      | 8  | 5  |
| chr2:120233635-120233754  | 0.0625                | 0.0496               | 0.1673            | 0.0398              | 337     | 8  | 4  |
| chr2:179051624-179051743  | 0.0516                | 0.0546               | 0.0895            | 0.0645              | 65      | 4  | 3  |
| chr3:51397224-51397343    | 0.0622                | 0.041                | 0.1774            | 0.0557              | 47      | 6  | 8  |
| chr6:74287320-74287439    | 0.0293                | 0.0406               | 0.0831            | NA                  | 195     | 2  | 5  |
| chr6:133177451-133177570  | 0.0398                | 0.0598               | 0.3223            | 0.02                | 49      | 12 | 8  |
| chr7:44496899-44497018    | 0.1045                | 0.0612               | 0.1868            | 0.0367              | 119     | 7  | 7  |
| chr8:11697171-11697290    | 0.0593                | 0.0739               | 0.2301            | 0.0842              | 128     | 10 | 5  |
| chr8:25372694-25372813    | 0.0334                | 0.0634               | 0.2002            | 0.0517              | 306     | 5  | 8  |
| chr9:38383103-38383222    | 0.0521                | 0.0535               | 0.14              | 0.0385              | 176     | 8  | 3  |
| chr9:94095703-94095822    | 0.0552                | 0.0642               | 0.148             | 0.0712              | 444     | 4  | 6  |
| chr11:120668866-120668985 | 0.0473                | 0.0615               | 0.4687            | 0.0444              | 87      | 4  | 0  |
| chr11:122437507-122437626 | 0.0886                | 0.0912               | 0.2047            | 0.1254              | 263     | 10 | 6  |
| chr12:52131830-52131949   | 0.059                 | 0.0612               | 0.0751            | 0.0228              | 133     | 5  | 2  |
| chr12:55129071-55129190   | 0.0297                | 0.0388               | 0.1048            | 0.0561              | 407     | 4  | 4  |
| chr13:46268830-46268949   | 0.0453                | 0.0724               | 0.1148            | 0.0636              | 99      | 7  | 2  |
| chr16:86357152-86357271   | 0.0885                | 0.0898               | 0.2132            | 0.0758              | 149     | 8  | 5  |
| chr19:8484945-8485064     | 0.0419                | 0.0881               | 0.1209            | 0.0793              | 116     | 7  | 2  |
| chr20:1047121-1047240     | 0.0409                | 0.0524               | 0.1296            | 0.0668              | 102     | 5  | 4  |
| chr20:17498496-17498615   | 0.0368                | 0.0476               | 0.2128            | 0.0623              | 49      | 9  | 7  |
| chr20:21231755-21231874   | 0.0504                | 0.0637               | 0.1418            | 0.0572              | 332     | 6  | 4  |
| chr22:39676601-39676720   | 0.075                 | 0.0758               | 0.1157            | 0.0899              | 27      | 2  | 8  |
| chrX:150315926-150316045  | 0.0334                | 0.0266               | 0.0862            | 0.0365              | 38      | 5  | 2  |

$K_{\text{pseudo}}^*$ , the rate of extended pseudo promoter, which is calculated from the 1 kb upstream non-coding region that is 1 kb away from a core promoter

$K_{\text{between}}$  is calculated from the region between a core promoter and the corresponding pseudo promoter

$K_{\text{intron}}$ , the rate of intron region, which is calculated from a 1 kb randomly chosen intronic region

site\_4f, the number of four-fold degenerate sites

n1, the number of substitutions at the 35-bp flanking regions within a core promoter

n2, the number of substitutions at the middle 50 bp of a core promoter

Table S3. GO term analysis of inferred positively selected genes

| GO Term            | Category description                                                    | <i>n</i> | <i>N</i> | <i>PI</i> | <i>P2</i> |
|--------------------|-------------------------------------------------------------------------|----------|----------|-----------|-----------|
| Biological process |                                                                         |          |          |           |           |
| GO:0008152         | metabolic process                                                       | 16       | 1113     | 0.05      | /         |
| GO:0009987         | cellular process                                                        | 16       | 1378     | 0.39      | /         |
| GO:0043170         | macromolecule metabolic process                                         | 14       | 957      | 0.076     | /         |
| GO:0006139         | nucleobase\, nucleoside\, nucleotide and nucleic acid metabolic process | 6        | 590      | /         | 0.54      |
| GO:0009058         | biosynthetic process                                                    | 5        | 176      | 0.035     | /         |
| GO:0050789         | regulation of biological process                                        | 4        | 660      | /         | 0.11      |
| GO:0050896         | response to stimulus                                                    | 4        | 218      | 0.20      | /         |
| GO:0009056         | catabolic process                                                       | 3        | 96       | 0.082     | /         |
| GO:0006928         | cell motility                                                           | 2        | 50       | 0.10      | /         |
| GO:0007275         | multicellular organismal development                                    | 1        | 258      | /         | 0.21      |
| GO:0006519         | amino acid and derivative metabolic process                             | 1        | 40       | 0.354     | /         |
| GO:0006118         | electron transport                                                      | 0        | 39       | /         | 0.65      |
| GO:0006810         | transport                                                               | 0        | 253      | /         | 0.05      |
| GO:0030154         | cell differentiation                                                    | 0        | 221      | /         | 0.079     |
| GO:0007154         | cell communication                                                      | 0        | 359      | /         | 0.014     |
| GO:0008219         | cell death                                                              | 0        | 130      | /         | 0.24      |
| GO:0046903         | secretion                                                               | 0        | 45       | /         | 0.61      |
| Molecular function |                                                                         |          |          |           |           |
| GO:0005488         | binding                                                                 | 16       | 1400     | 0.43      | /         |
| GO:0003824         | catalytic activity                                                      | 10       | 628      | 0.1       | /         |
| GO:0005515         | protein binding                                                         | 10       | 846      | 0.43      | /         |
| GO:0003676         | nucleic acid binding                                                    | 5        | 516      | /         | 0.50      |
| GO:0016787         | hydrolase activity                                                      | 5        | 249      | 0.12      | /         |
| GO:0016491         | oxidoreductase activity                                                 | 3        | 77       | 0.048     | /         |
| GO:0005198         | structural molecule activity                                            | 2        | 73       | 0.19      | /         |
| GO:0030234         | enzyme regulator activity                                               | 1        | 89       | 0.63      | /         |
| GO:0016874         | ligase activity                                                         | 1        | 70       | 0.54      | /         |
| GO:0016740         | transferase activity                                                    | 1        | 215      | /         | 0.31      |
| GO:0030528         | transcription regulator activity                                        | 0        | 227      | /         | 0.074     |
| GO:0004871         | signal transducer activity                                              | 0        | 132      | /         | 0.23      |
| GO:0004872         | receptor activity                                                       | 0        | 82       | /         | 0.41      |
| GO:0016301         | kinase activity                                                         | 0        | 111      | /         | 0.29      |
| GO:0005215         | transporter activity                                                    | 0        | 79       | /         | 0.42      |
| Cellular Component |                                                                         |          |          |           |           |
| GO:0005623         | cell                                                                    | 18       | 1532     | 0.30      | /         |
| GO:0005622         | intracellular                                                           | 18       | 1312     | 0.041     | /         |
| GO:0005737         | cytoplasm                                                               | 12       | 640      | 0.015     | /         |
| GO:0005634         | nucleus                                                                 | 7        | 737      | /         | 0.43      |
| GO:0016020         | membrane                                                                | 3        | 493      | /         | 0.18      |
| GO:0009986         | cell surface                                                            | 1        | 16       | 0.16      | /         |
| GO:0005694         | chromosome                                                              | 0        | 58       | /         | 0.53      |
| GO:0005576         | extracellular region                                                    | 0        | 76       | /         | 0.43      |

The *P*-value is the raw value from the binomial test. *n*, # of positively selected genes; *N*, # of annotated genes; *PI*, *P*-value for over-representation; *P2*, *P*-value for under-representation.

Table S4. The SNPs with an extreme *iHS* value

| SNP_ID     | Population | his    | Promoter_location         | Gene_ID | Gene_Symbol |
|------------|------------|--------|---------------------------|---------|-------------|
| rs10796921 | CEU        | -2.653 | chr1:35794895-35795014    | 79932   | KIAA0319L   |
| rs737381   | CEU        | 2.763  | chr1:36393739-36393858    | 55700   | MAP7D1      |
| rs6766480  | ASN        | 3.034  | chr3:197498468-197498587  | 5130    | PCYT1A      |
| rs3806980  | ASN        | -2.981 | chr6:74287920-74288039    | 1915    | EEF1A1      |
| rs2278203  | CEU        | -2.507 | chr8:82760774-82760893    | 3612    | IMPA1       |
| rs2275639  | CEU        | -2.523 | chr9:110735899-110736018  | 8518    | IKBKAP      |
| rs1571856  | CEU        | 3.202  | chr9:134271896-134272015  | 7270    | TTF1        |
| rs2070627  | YRI        | 4.893  | chr12:123964605-123964724 | 7316    | UBC         |
| rs2273315  | CEU        | -2.570 | chr14:38642473-38642592   | 10484   | SEC23A      |
| rs8066463  | YRI        | -2.536 | chr17:59172099-59172218   | 92335   | LYK5        |
